# Supplementary material for: P3HT-based visible-light organic photodetectors using PEI/PAA multilayers as a p-type buffer layer
Source: Royal Society of Chemistry journal article supplement (doi:10.1039/c9ra08568h), 2019-01-01
Supplement: c9ra08568h1.pdf [file c9ra08568h1.pdf]

Supporting Information

# P3HT-Based Visible-Light Organic Photodetectors Using PEI/PAA Multilayers as a p-Type Buffer Layer

*Chan Hyuk Ji, Seon Ju Lee and Se Young Oh\**

Department of Chemical and Biomolecular Engineering, Sogang University, Seoul 04107,  
Republic of Korea

**Table S1** Thickness and RMS surface roughness according to the number of PEI/PAA bilayers.

|                            | Thickness (nm) | RMS (nm) |
|----------------------------|----------------|----------|
| ITO                        | 135.8±0.3      | 4.4±0.3  |
| ITO/(PEI/PAA) <sub>1</sub> | 3.3±0.1        | 3.5±0.2  |
| ITO/(PEI/PAA) <sub>2</sub> | 7.4±0.4        | 1.4±0.2  |
| ITO/(PEI/PAA) <sub>3</sub> | 12.2±0.9       | 1.4±0.1  |
| ITO/(PEI/PAA) <sub>4</sub> | 19.4±0.2       | 1.4±0.1  |

**Table S2** Comparison of P3HT-based photodetector with similar structure.

| Structure                                                                               | Responsivity (A/W) | Dark current density (A/cm <sup>2</sup> ) | D * (Jones)             | Reference |
|-----------------------------------------------------------------------------------------|--------------------|-------------------------------------------|-------------------------|-----------|
| <b>ITO/(PEI/PAA)<sub>2</sub>/P3HT:PC<sub>60</sub>BM/Yb/Al</b><br>(at 525 nm, -1 V)      | 0.304              | 2.99 x 10 <sup>-8</sup>                   | 3.11 x 10 <sup>12</sup> | This work |
| <b>ITO/PEIE/P3HT:PC<sub>60</sub>BM/Al</b><br>(at 550 nm, -1 V)                          | 14.25              | 2.77 x 10 <sup>-6</sup>                   | 1.04 x 10 <sup>12</sup> | [49]      |
| <b>ITO/PEDOT:PSS/P3HT:PC<sub>60</sub>BM/LiF/Al</b><br>(at 530 nm, -1 V)                 | 0.17               | 3.6 x 10 <sup>-7</sup>                    | 3.15 x 10 <sup>11</sup> | [12]      |
| <b>ITO/PEDOT:PSS/PbS: P3HT:PC<sub>60</sub>BM:ZnO/Al</b><br>(at 500nm, -4V)              | 5.6                | ≐ 2 x 10 <sup>-5</sup>                    | 1.01 x 10 <sup>12</sup> | [51]      |
| <b>PEN/Ag/P3HT:PC<sub>60</sub>BM/PEDOT:PSS</b><br>(at 525nm, 0.9V)                      | ≐ 0.66             | ≐ 2 x 10 <sup>-7</sup>                    | 1.5 x 10 <sup>12</sup>  | [52]      |
| <b>PEN/PEDOT:PSS/PEI/P3HT:PC<sub>60</sub>BM/poly-PT/PEDOT:PSS</b><br>(at 505 nm, -0.1V) | ≐ 0.3              | 7.5 x 10 <sup>-8</sup>                    | 2.2 x 10 <sup>12</sup>  | [53]      |

\* ≐ is calculation value.

#### Reference

[49] Y. Wang, L. Zhu, Y. Hu, Z. Deng, Z. Lou, Y. Hou and F. Teng, *Opt. Express*, 2017, **25**, 7719.

[12] B. Arredondo, B. Romero, J. M. S. Pena, A. Fernández-Pacheco, E. Alonso, R. Vergaz and C. de Sios, *Sensors*, 2013, **13**, 12266

[51] R. Dong, C. Bi, Q. Dong, F. Guo, Y. Yuan, Y. Fang and J. Huang, *Adv. Opt. Mater.*, 2014, **2**, 549.

[52] G. Azzellino, A. Grimoldi, M. Binda, M. Caironi, D. Natali and M. Sampietro, *Adv. Mater.*, 2013, **25**, 6829.

[53] A. Grimoldi, L. Colella, L. L. Monaca, G. Azzellino, M. Caironi, C. Bertarelli, D. Natali and M. Sampietro, *Org. Electron.*, 2016, **36**, 29.

**Table S3** Electrical parameters calculated from impedance values of OPDs (at light state, -1V).

|                    |                    | PEIE (7.5nm)              | (PEI/PAA) <sub>2</sub> (7.4nm) |
|--------------------|--------------------|---------------------------|--------------------------------|
|                    | R <sub>1</sub> (Ω) | 20 (ITO sheet resistance) |                                |
| C <sub>1</sub> (F) | Light              | 2.51×10 <sup>-9</sup>     | 2.90×10 <sup>-9</sup>          |
| R <sub>2</sub> (Ω) | Light              | 1.52×10 <sup>3</sup>      | 5.70×10 <sup>2</sup>           |

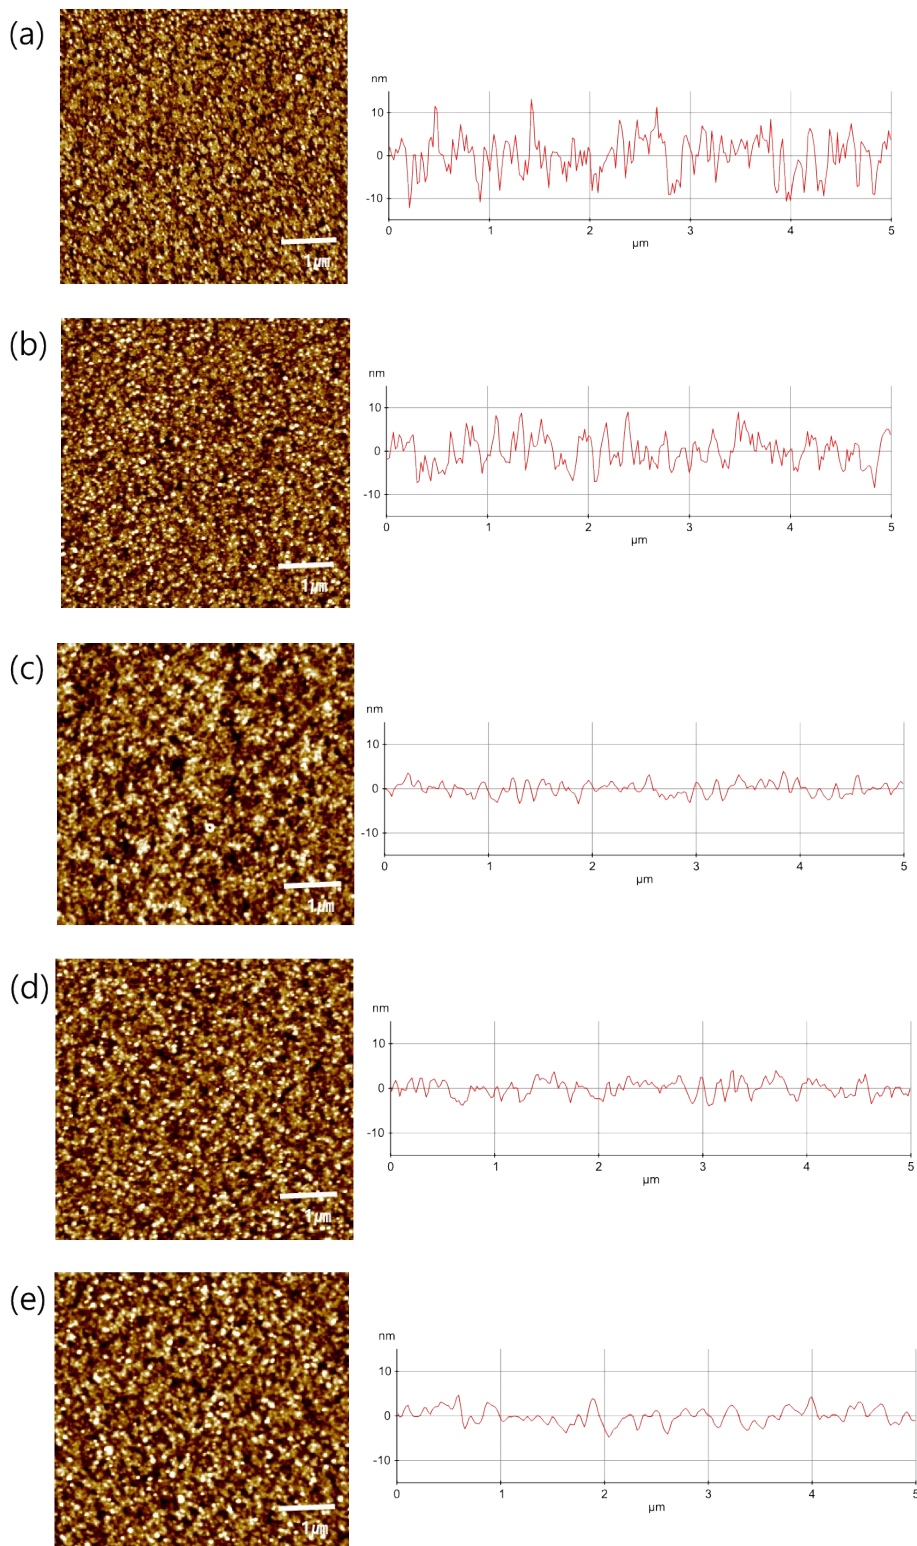

**Fig. S1** AFM images of (a) bare ITO, (b) ITO/(PEI/PAA)<sub>1</sub>, (c) ITO/(PEI/PAA)<sub>2</sub>, (d) ITO/(PEI/PAA)<sub>3</sub>, and (e) ITO/(PEI/PAA)<sub>4</sub> surfaces. Graphs on the right side show the corresponding section images of the center position.

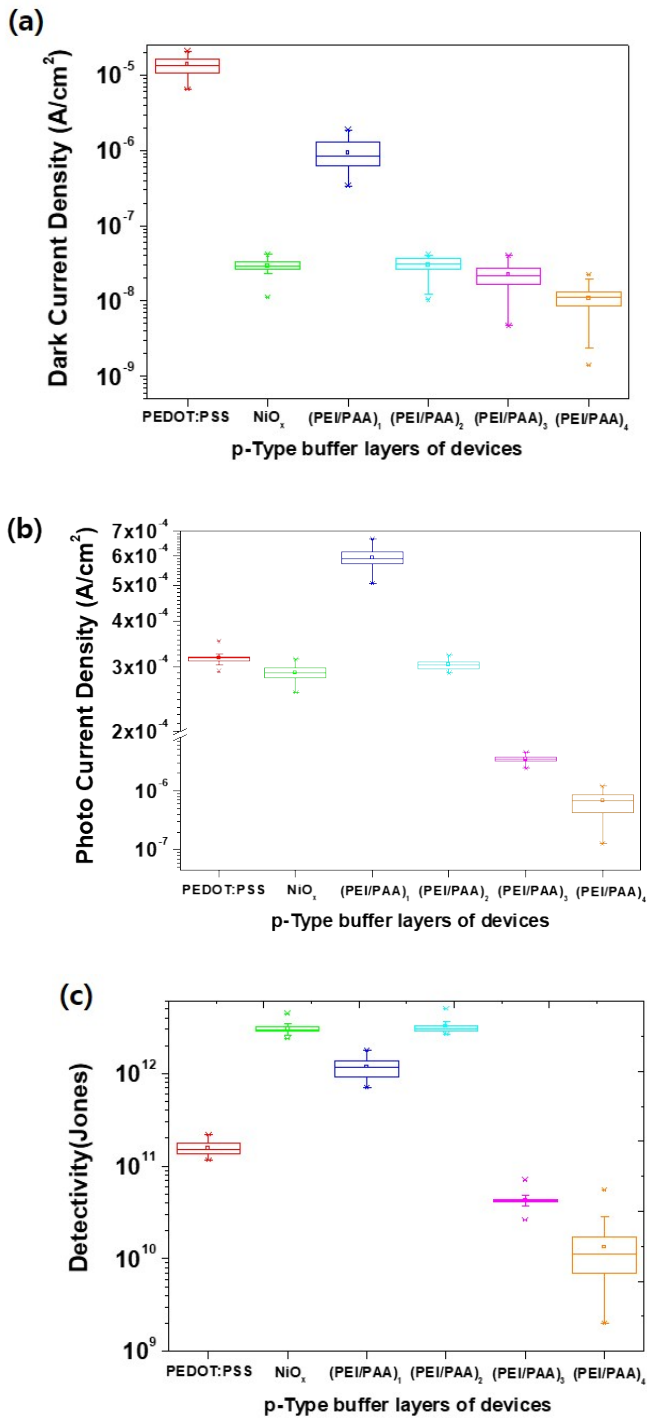

**Fig. S2** Device statistics for (a) dark current density, (b) photocurrent density (at 525 nm, -1 V), and (c) detectivity of OPDs comprising different p-type buffer layers. The standard box plots represent the standard deviations (90% of all data points lie between the upper and lower whiskers).

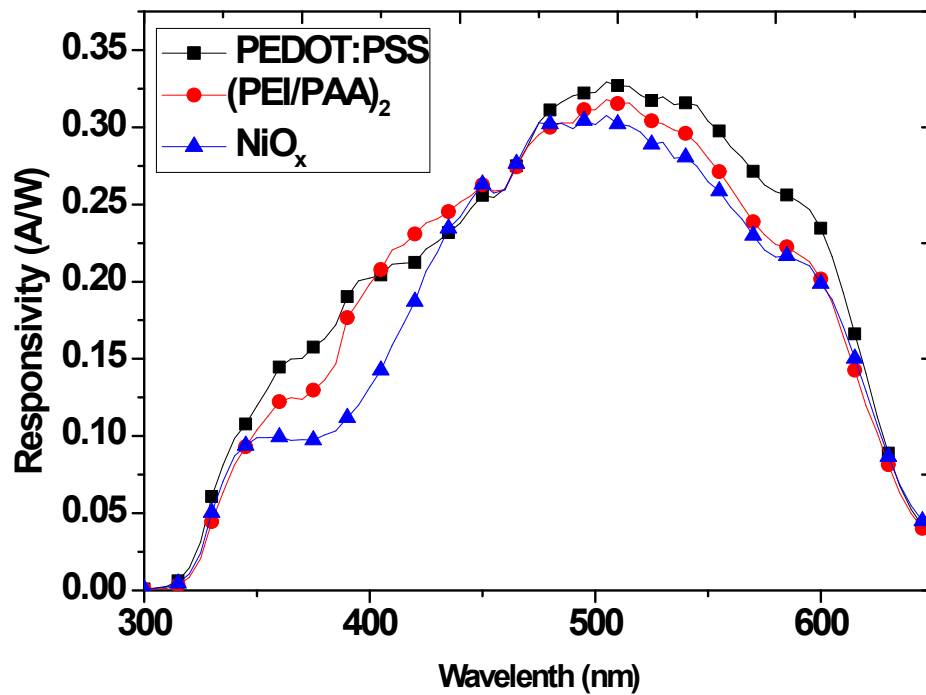

**Fig. S3** Responsivities of OPDs comprising different p-type buffer layers at different wavelengths (1 mW/cm<sup>2</sup>).

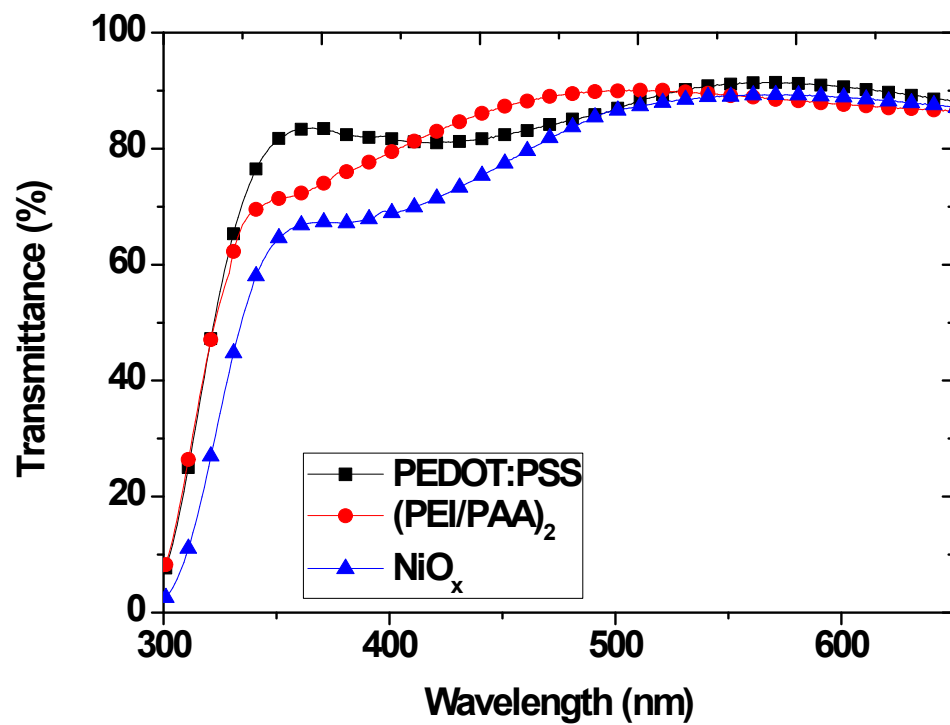

Fig. S4 Transmittances of p-type buffer layers on glass/ITO substrates.

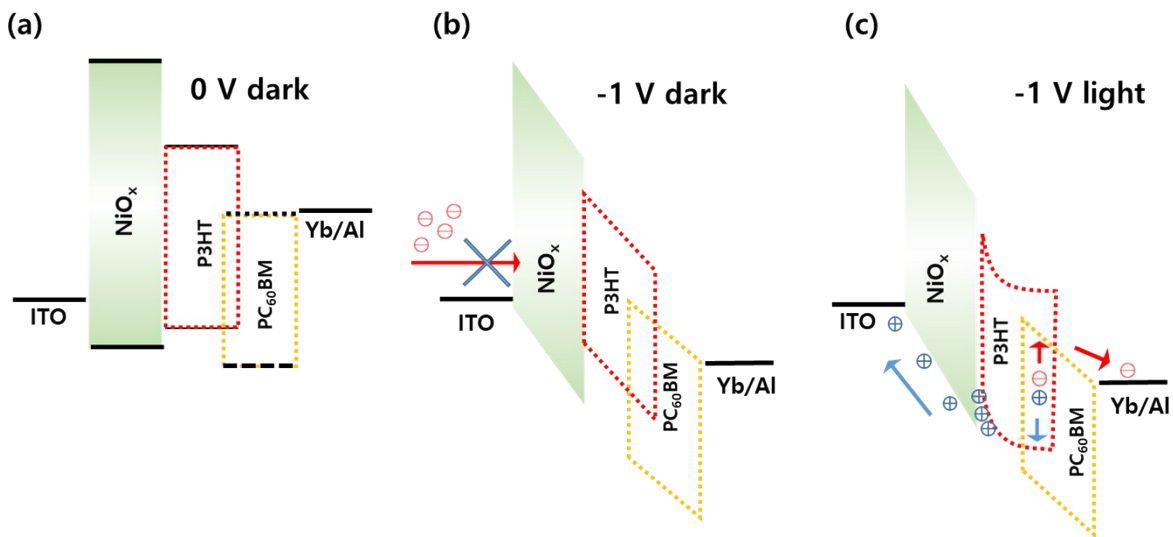

**Fig. S5** Carrier transport mechanism of the device using NiO<sub>x</sub>. (a) 0 V, dark state; (b) -1 V, dark state; and (c) -1 V, light state.



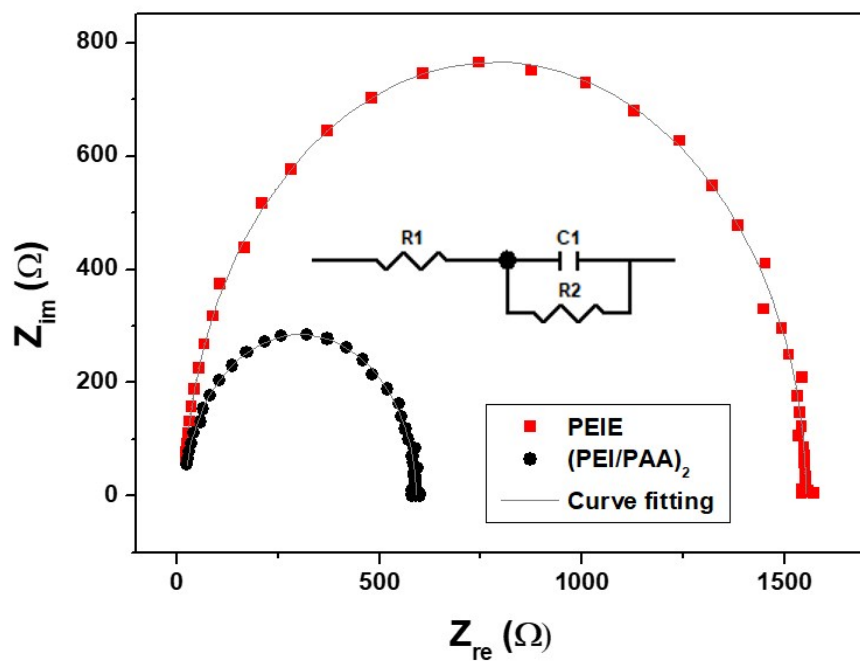

**Fig. S6** Impedance spectra measured under light condition at 525 nm, -1 V and 1  $mW/cm^2$ . The inset shows the equivalent circuit used to model the impedance.

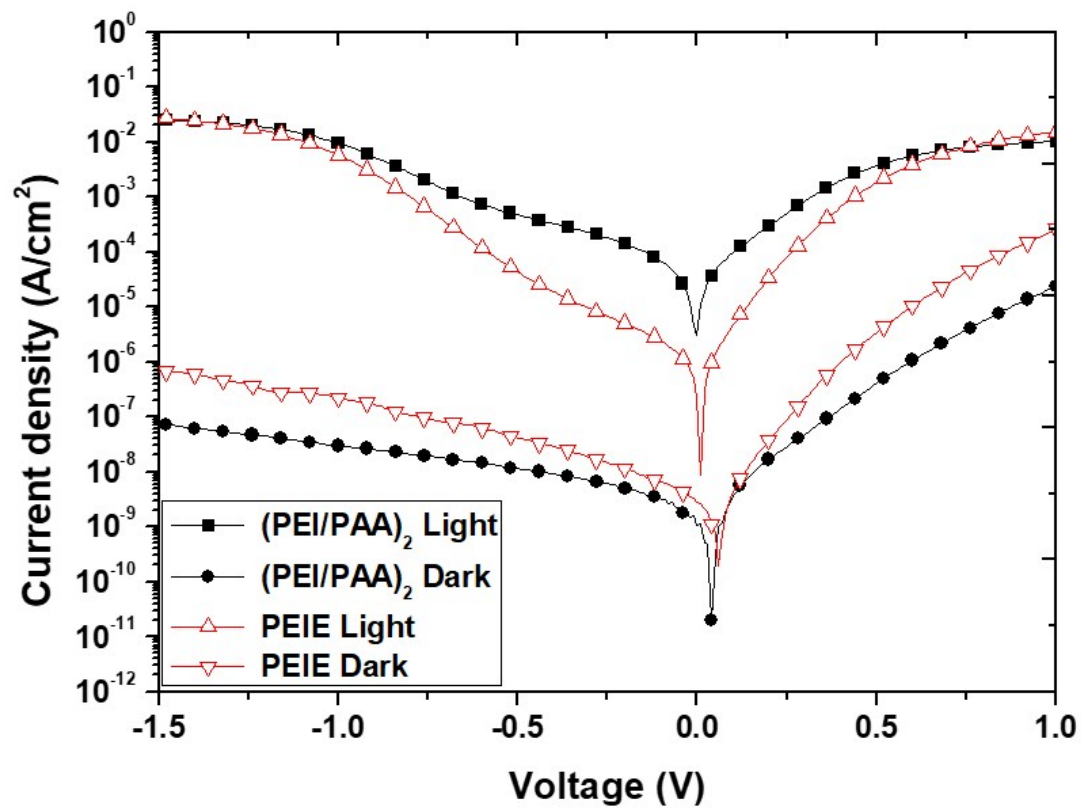

Fig. S7 Logarithmic J–V characteristics of OPDs at light (1sun) and dark state.

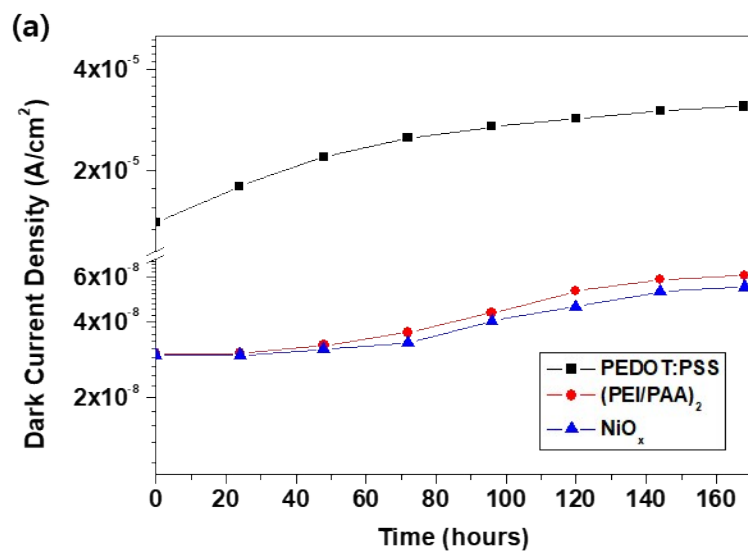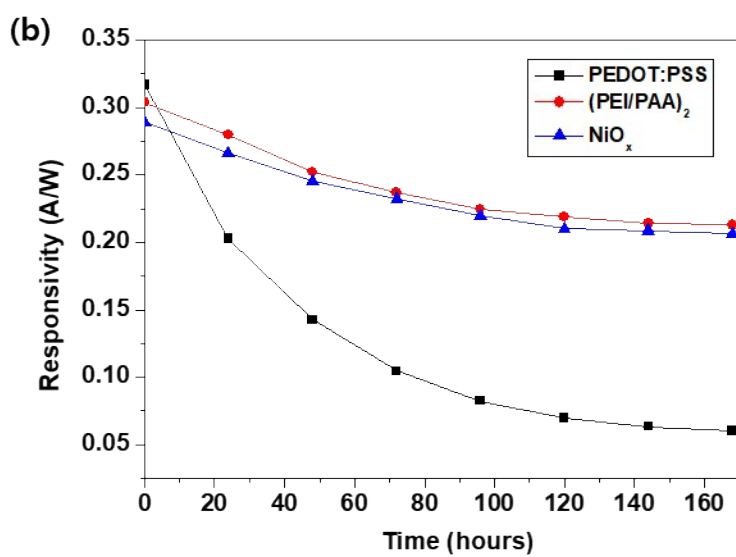

**Fig. S8** (a) Dark current densities and (b) responsivities of OPDs over 168 h (7 days) after fabrication.

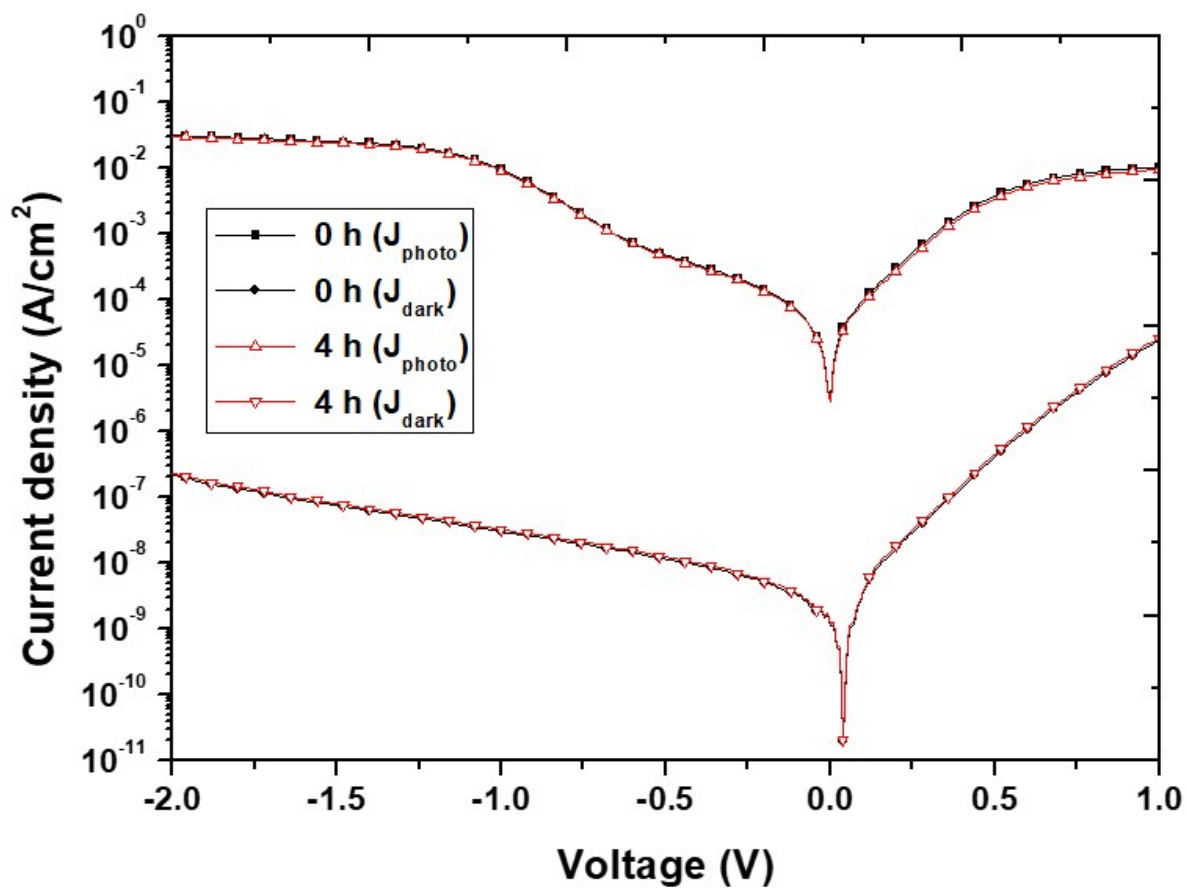

**Fig. S9** Logarithmic J–V characteristics of the device using (PEI/PAA)<sub>2</sub> at light (1sun) and dark state with 1sun irradiation time.
